# Supplementary material
Source: Springer Nature journal article supplement (https://www.springermedizin.de/resource/supplementary/12913_2012_2415_MOESM2_ESM.pdf/9530468)

# Thyolo-Malawi

## A. Probability of Retention in ART care – 0m

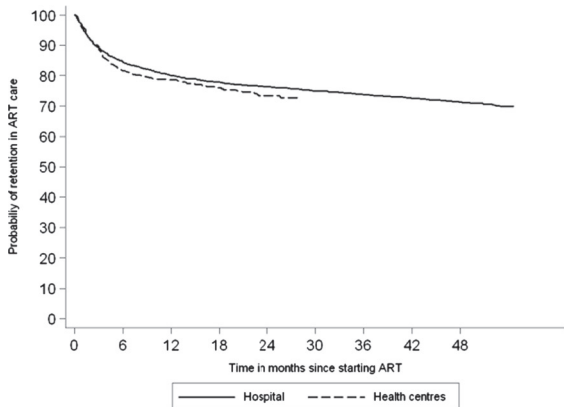

## B. Probability of Retention in ART care – >12m

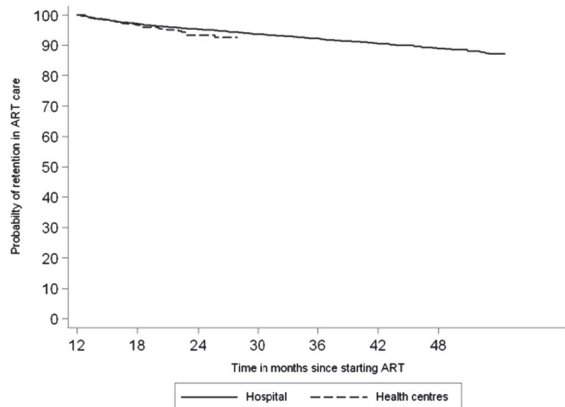

# Buhera - Zimbabwe

## C. Probability of Retention in ART care – 0m

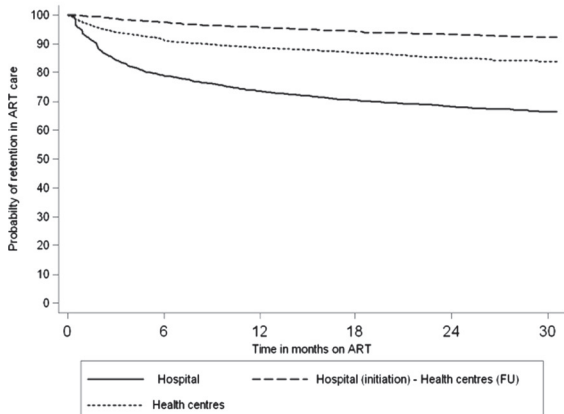

## D. Probability of Retention in ART care – >12m

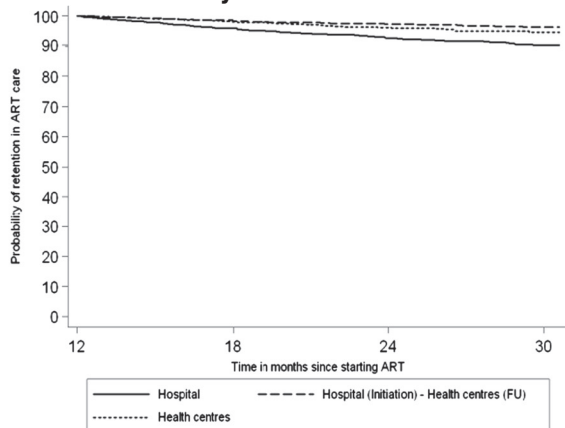

Supplement: MOESM2 [file 9530468]
